# Biginelli Reaction Catalyzed by Copper Nanoparticles

Manika Dewan<sup>1</sup>, Ajeet Kumar<sup>1</sup>, Amit Saxena<sup>1</sup>, Arnab De<sup>2</sup>, Subho Mozumdar<sup>1\*</sup>

**1** Department of Chemistry, University of Delhi, Delhi, India, **2** Department of Microbiology and Immunology, Columbia University Medical Center, New York, New York, United States of America

## Abstract

We recently reported a novel synthesis of copper nanoparticles from copper sulphate utilizing the charge-compensatory effect of ionic liquid [bmim]BF<sub>4</sub> and ethylene glycol. The nanoparticles were characterized and found to be stable for one year. Here we hypothesize that the stabilized nanoparticles should be able to catalyze one-pot multicomponent organic reactions. We show that the nanoparticles catalyzed Biginelli reaction at room temperature to give the product 3,4-dihydropyrimidinone (>90% yield in ~15 minutes) from aldehydes,  $\beta$ -diketoester (ethylacetoacetate) and urea (or thiourea). Remarkably, such high yields and rapid kinetics was found to be independent of the electronic density on the reactant aryl-aldehyde. This was probably because even the surface-active particles reacted faster in the presence of ionic liquid as compared to conventional methods. The heterocyclic dihydropyrimidinones (DHPMs) and their derivatives are widely used in natural and synthetic organic chemistry due to their wide spectrum of biological and therapeutic properties (resulting from their antibacterial, antiviral, antitumor and anti-inflammatory activities). Our method has an easy work-up procedure and the nanoparticles could be recycled with minimal loss of efficiency.

**Citation:** Dewan M, Kumar A, Saxena A, De A, Mozumdar S (2012) Biginelli Reaction Catalyzed by Copper Nanoparticles. PLoS ONE 7(8): e43078. doi:10.1371/journal.pone.0043078

**Editor:** Andrew C. Marr, Queen's University Belfast, United Kingdom

**Received:** February 6, 2012; **Accepted:** July 16, 2012; **Published:** August 17, 2012

**Copyright:** © 2012 Dewan et al. This is an open-access article distributed under the terms of the Creative Commons Attribution License, which permits unrestricted use, distribution, and reproduction in any medium, provided the original author and source are credited.

**Funding:** These authors have no support or funding to report.

**Competing Interests:** The authors have declared that no competing interests exist.

\* E-mail: subhoscom@yahoo.co.in

## Introduction

The world today is experiencing the benefits of metal nanoparticles in a host of different areas including but not limited to optics, electronics and medicine [1]. Copper is an example of a metal nanoparticle which has gained considerable attention in the past two decades due to its unusual properties, leading to potential applications in many diverse fields. To exemplify, non-agglomerated, spherical, uniform copper nanoparticles finds use in lubrication, as nanofluids and catalysts, etc [2,3]. Hence not surprisingly, a number of methods such as microemulsion, reverse micelles, gamma irradiation, UV light irradiation, protecting electrolytic techniques by controlling electrode potential and the polyol process have been developed for the preparation of copper nanoparticles [4]. A one phase system using alkanethiolate as a protecting monolayer has been described for the synthesis of copper nanoparticles [5]. Besides, sonochemical methods and thermal decomposition methods have also been reported [6,7]. However, the copper nanoparticles synthesized by these methods have their limitations as they have a limited size, are mono-dispersed and susceptible to oxidation. Hence, there is a need to develop a methodology to synthesize copper nanoparticles with increased stability. We postulated that ionic liquids could be used in this respect to confer the stability to the nanoparticles.

Ionic liquids (ILs) have already emerged as a green alternative to the conventional and environmentally detrimental volatile solvents [8]. They have attracted a great deal of attention due to their high thermal stability, good conductivity, non volatility, non flammability, suitable polarity, wide electrochemical window and recyclability [8–11]. Most importantly, the physical and chemical properties of ILs can be exploited by altering their cation, anion

and attached substituents [12,13]. The aforementioned properties of ILs have been used extensively and they continue to be potentially useful for use in sensors [14], material synthesis [15–17], separation and extraction [18], asymmetric synthesis [19], nuclear fuel cycle processing [20], liquid thermal storage media and heat transfer fluids [21], lubricants [22], etc.

Imidazolium based ionic liquids like [bmim][BF<sub>4</sub>] has been selected as novel reaction media for promoting various organic transformation reactions because of its high miscibility with water [23]. It has been shown that [bmim][BF<sub>4</sub>] can increase the rate of diazocoupling between 4-substituted benzenediazonium tetrafluoroborates and  $\beta$ -naphthol in the presence of triethylamine [24]. Because of its hydrophilicity, convenient viscosity and ease of handling, [bmim][BF<sub>4</sub>] has also been used for synthesis of N-arylphthalimides (an important class of imide derivative substrates for biological and chemical applications) [25]. Imidazolium ILs are liquids at room temperature and provide an excellent medium for the formation and stabilization of transition metal nanoparticles. Their negligible vapor pressure allows the size and shape of the metal nanoparticles to be investigated *in situ* by TEM [26,27]. Typically, particles synthesized in organic solvents are immiscible with water and this severely limits their applicability. Many applications require that the nanoparticles be dispersed and stable in water. However, water based synthesis of nanoparticles is fraught with many problems such as ionic interactions, low reactant concentration, and difficulty in removing the stabilizers [28]. Ionic liquids could be used to overcome this as both the cation and anion of an ionic liquid can potentially serve as charge compensating groups in the synthetic procedure. When an ionic liquid is used as a reaction media, the solute is solvated by ions only. Thus, the reaction can proceed in a completely different

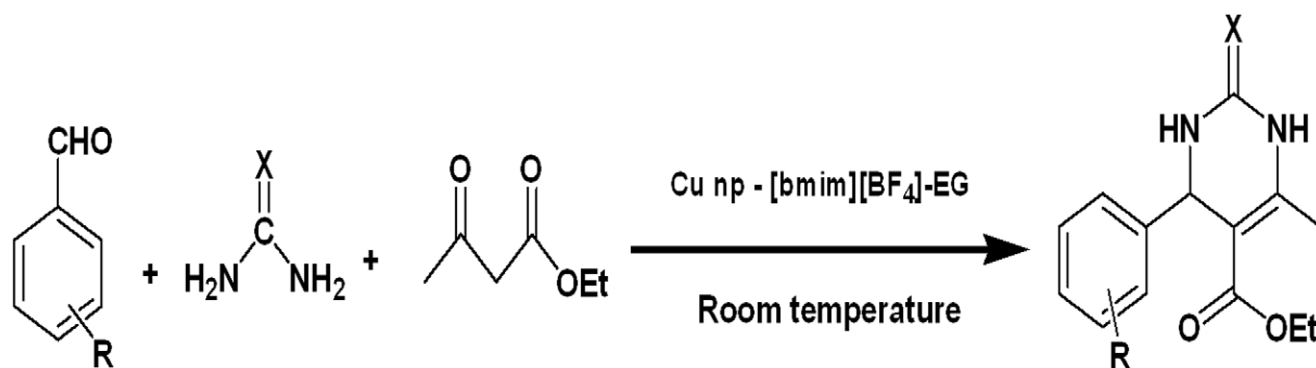

**Figure 1. Synthesis of 3,4 dihydropyrimidin-2-ones at room temperature.**

doi:10.1371/journal.pone.0043078.g001

environment as compared to when water or organic solvents are used. As a result, high selectivity is possible [29]. Our study provides an alternative to synthesizing nanomaterials with minimal energy consumption and high yield. We have previously synthesized and isolated well dispersed and size controlled copper nanoparticles in a ionic liquid  $[bmim]BF_4$  - ethylene glycol system without the aid of any heating or microwave irradiation [30]. These nanoparticles were found to be highly stable for one year.

We hypothesize that the stabilized nanoparticles should be able to catalyze one-pot multicomponent organic reactions. Hence, the synthesized copper nanoparticles were tested as catalysts for Biginelli reaction and the product 3,4-dihydropyrimidinones

(DHPMS) was formed in the presence of the ionic liquid  $[bmim]BF_4$  as a solvent. Dihydropyrimidinones (DHPMs) and their derivatives are heterocyclic units and widely used in natural and synthetic organic chemistry due to their wide spectrum of biological and therapeutic properties (resulting from their antibacterial, antiviral, antitumor and anti-inflammatory activities) [31]. Recently, appropriately functionalized DHPM analogs have emerged as integral backbones of several calcium channel blockers, antihypertensive agents and  $\alpha$ -la-adrenergic receptor antagonists [32]. Moreover, several alkaloids containing the dihydropyrimidine core unit have been isolated from marine sources and these have displayed interesting biological properties.

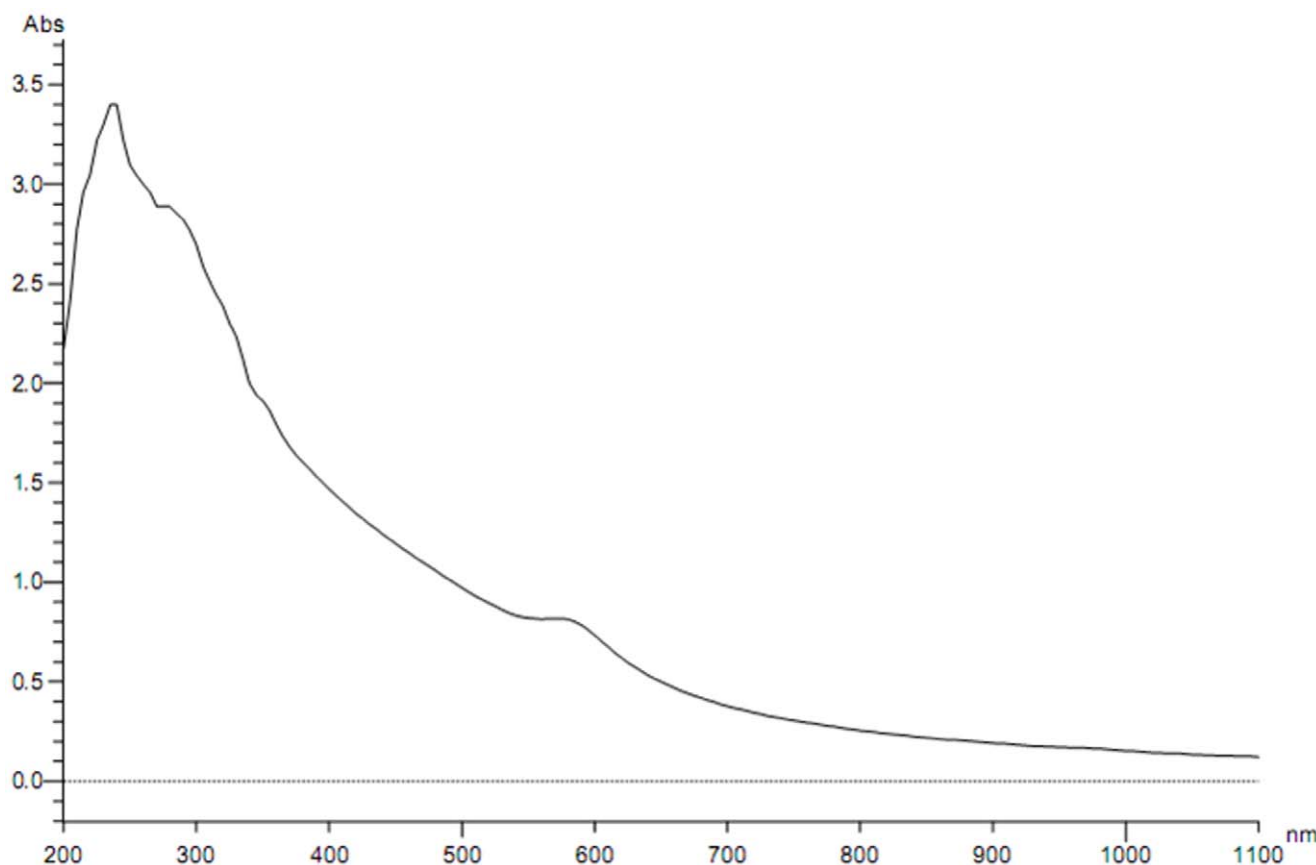

**Figure 2. UV-Visible spectra of Copper nanoparticles formed in "[bmim]BF<sub>4</sub> - ethylene glycol" system.**

doi:10.1371/journal.pone.0043078.g002

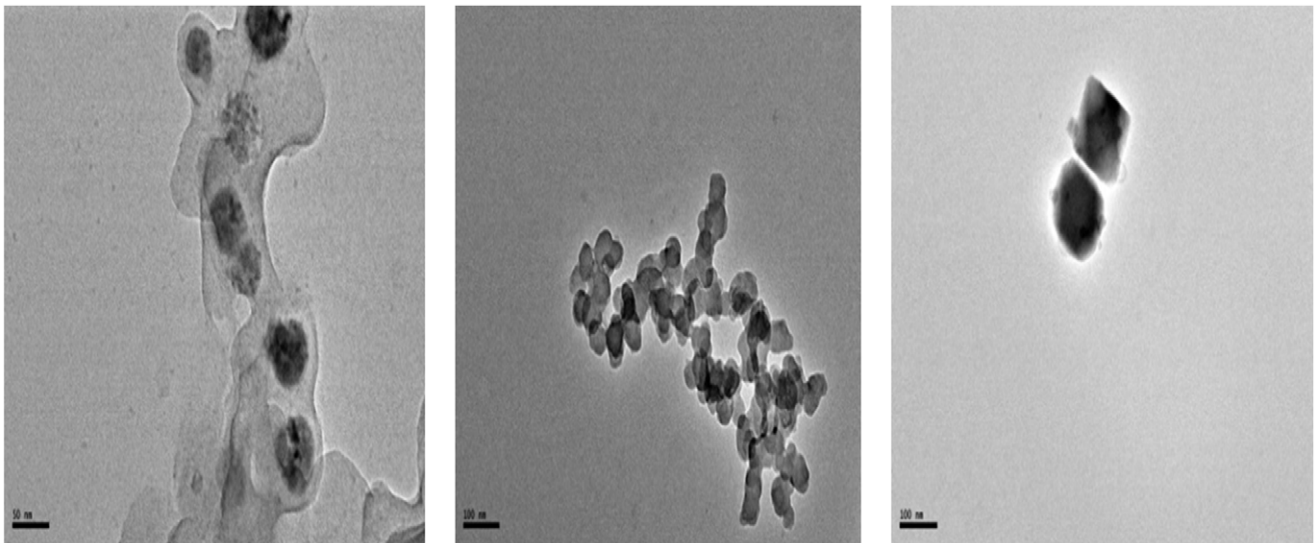

**Figure 3. TEM images of Copper nanoparticles formed in "[bmim]BF<sub>4</sub> - ethylene glycol" system.**  
doi:10.1371/journal.pone.0043078.g003

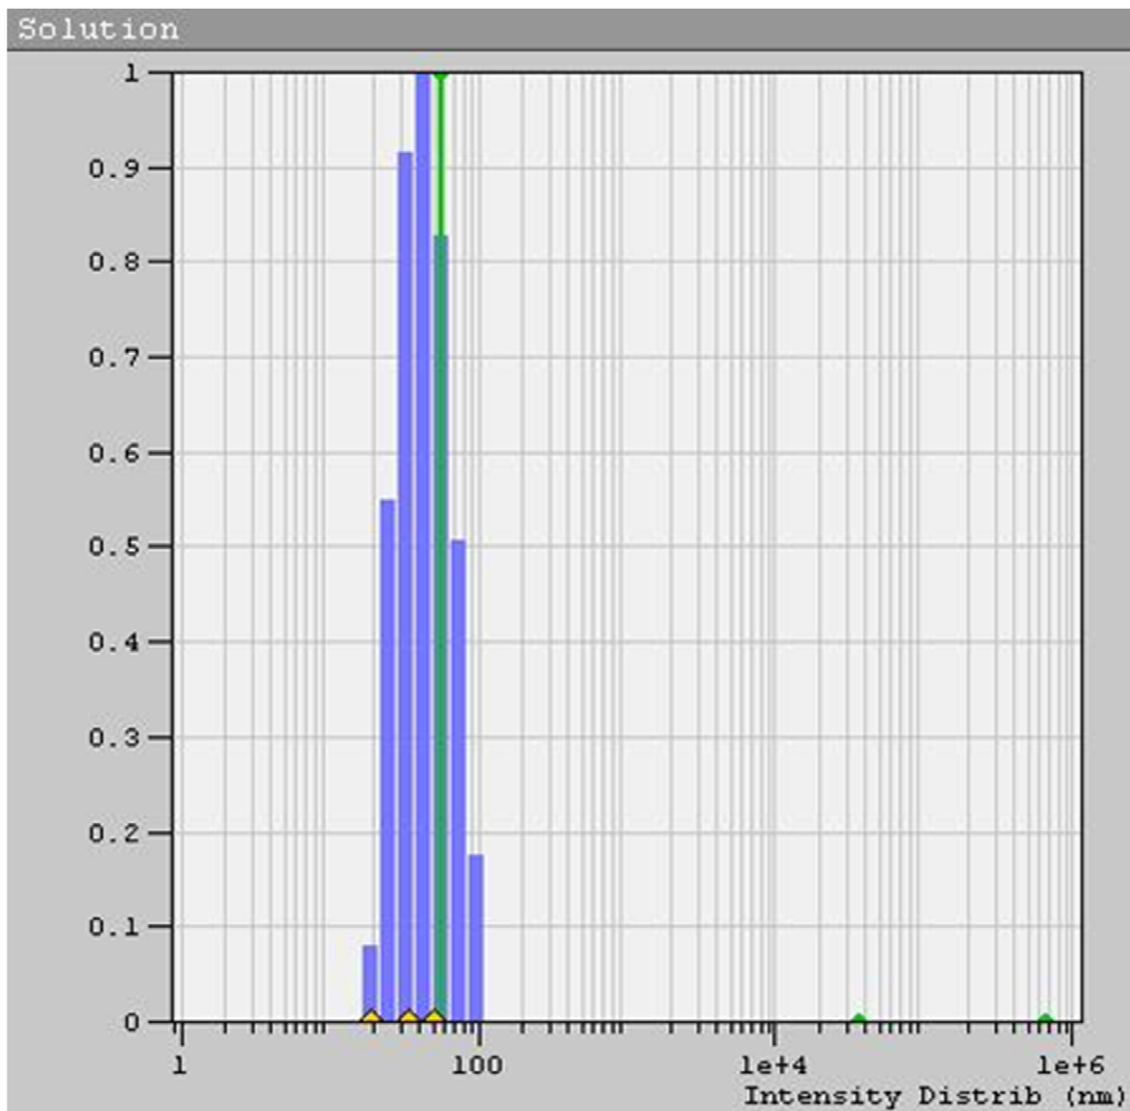

**Figure 4. Dynamic Light Scattering data of copper nanoparticles as prepared by this method "[bmim]BF<sub>4</sub> - ethylene glycol" system.**  
doi:10.1371/journal.pone.0043078.g004

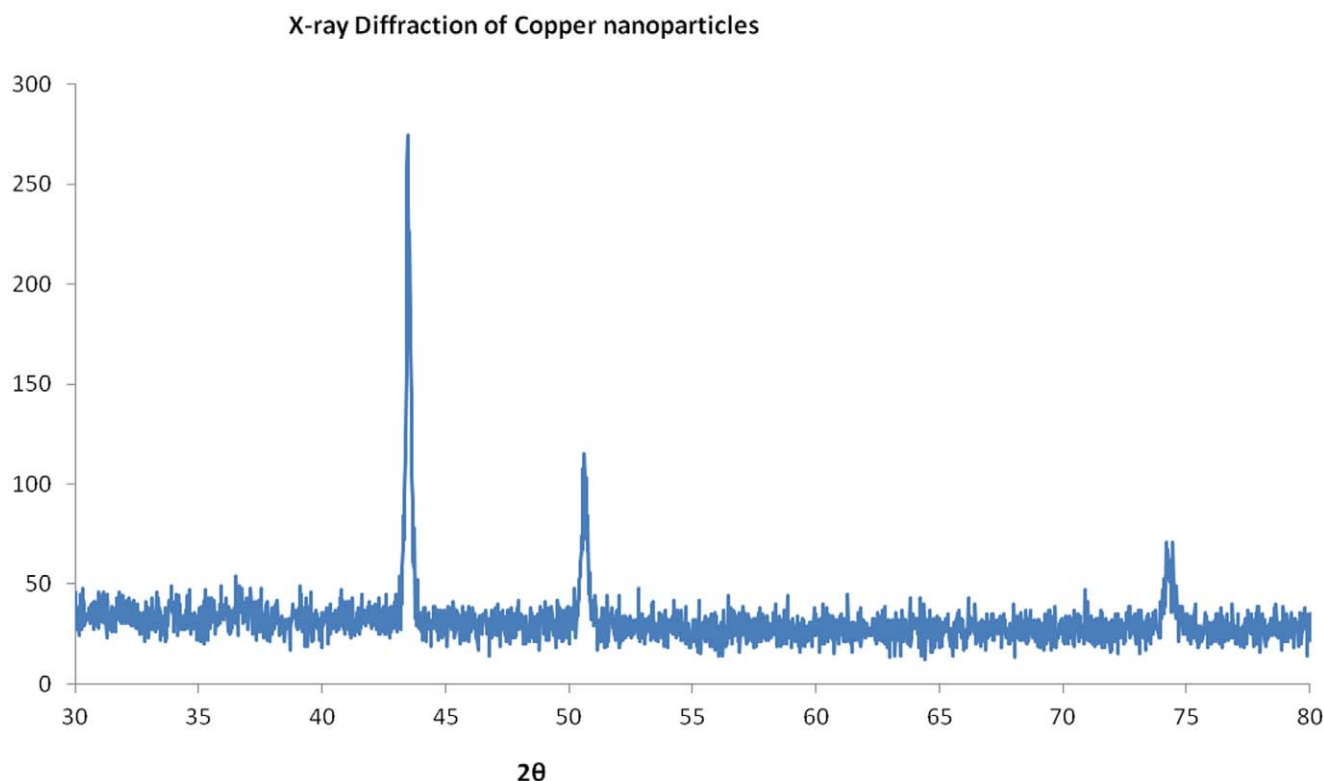

**Figure 5. XRD plot of Copper nanoparticles formed in "[bmim]BF<sub>4</sub> - ethylene glycol" system.**  
doi:10.1371/journal.pone.0043078.g005

In particular, the batzelladine alkaloids have been found to be potent HIV gp-120-CD4 inhibitors [33]. In view of the versatile properties of dihydropyrimidinones, the development of a novel, cost effective synthetic strategy is of immense importance. The reaction conditions traditionally employed involve strong Bronsted and Lewis acids, such as LiClO<sub>4</sub>, LaCl<sub>3</sub>·7H<sub>2</sub>O, InCl<sub>3</sub>, Bi(OTf)<sub>3</sub>, BiCl<sub>3</sub>, Mn(OAc)<sub>3</sub>, Cu(OTf)<sub>2</sub>, FeCl<sub>3</sub>·6H<sub>2</sub>O, ZrCl<sub>4</sub> or SnCl<sub>2</sub>·2H<sub>2</sub>O [34]. Among the Si-MCM-41 or montmorillonite K 10 clay supported ZnCl<sub>2</sub>, AlCl<sub>3</sub>, GaCl<sub>3</sub>, InCl<sub>3</sub> and FeCl<sub>3</sub> catalysts, FeCl<sub>3</sub>/Si-MCM-41 has shown best results for microwave assisted synthesis of dihydropyrimidinones [35]. Formic acid has been used under solventless conditions for microwave irradiated synthesis of these compounds [36] while Cu(OTf)<sub>2</sub> has also been used at 100°C in the presence of ethanol [37]. There have also been previous reports on the use of solid-phase protocols which allow higher degree of throughput and automation [38]. An earlier method to synthesize dihydropyrimidinones in ionic liquid involved heating and this was the possible reason why the catalyst could not be recycled [39]. Additionally, the yields obtained with some of the aldehydes is low. Similarly, dihydropyrimidinones have been synthesized using Cu(BF<sub>4</sub>)<sub>2</sub>·xH<sub>2</sub>O as a catalyst; however as in the previous case, the catalyst has recyclability issues [40]. Metal nanoparticles has been previously demonstrated to efficiently catalyze a variety of organic reactions [41–47]. Here we have used copper nanoparticles dispersed in ionic liquid/ethylene glycol for the synthesis of 3,4-dihydropyrimidinones at room temperature with reduced reaction times and much higher yields (Supporting information S1, graphical abstract; Figure 1). The nanoparticles retained its efficacy after multiple cycles of reaction.

## Experimental

### 1. Materials

Copper sulphate pentahydrate (CuSO<sub>4</sub>·5H<sub>2</sub>O), ethylene glycol, sodium tetrafluoroborate and 1-butyl-3-methylimidazoliumbromide were all of analytical grade and used as such. All the aldehydes and solvents were purchased from spectrochem Pvt. Ltd. Mumbai (India) and were used without any additional purification. All reactions were monitored by thin layer chromatography (TLC) on gel F254 plates. <sup>1</sup>H-NMR and <sup>13</sup>C-NMR spectra were recorded in CDCl<sub>3</sub> and DMSO-d<sub>6</sub> on a Jeol JNN ECX- 400P spectrometer; Melting points were recorded on SECOR Laboratories instruments melting point instruments. The infrared spectra were recorded using a model Perkin Elmer spectrum BX2 FT-IR system. Spectra were recorded with Spectrum V 5.3.1 software in the range 4000–400 cm<sup>−1</sup>. The KBr pellet technique was adopted for recording the spectra.

### 2. Synthesis of Ionic Liquid (IL) [bmim]BF<sub>4</sub> and Preparation of Copper Nanoparticles in IL-Ethylene Glycol Media

Sodium tetrafluoroborate and 1-butyl-3-methylimidazoliumbromide in equimolar quantities were stirred in dry acetone under anhydrous conditions for 48 h. The mixture was filtered off to remove unreacted sodium tetrafluoroborate and the filtrate was further treated with dichloromethane to remove sodium bromide and again the filtrate obtained was again treated with dichloromethane to check for any further precipitation. The solvents were removed under reduced pressure and the resulting colorless ionic liquid was dried in rotavapor at 70°C for 2 h to remove water. The product 1-butyl-3-methylimidazoliumtetrafluoroborate was

| S.No. | X | R                                                   | Product                                                                             | Yield (%) | Time (min) |
|-------|---|-----------------------------------------------------|-------------------------------------------------------------------------------------|-----------|------------|
| 1     | O | C <sub>6</sub> H <sub>5</sub>                       | 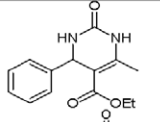   | 98        | 10         |
| 2     |   | 4-Cl-C <sub>6</sub> H <sub>4</sub>                  |    | 97        | 12         |
| 3     |   | 4-(OCH <sub>3</sub> )-C <sub>6</sub> H <sub>4</sub> |    | 95        | 14         |
| 4     |   | 4-(NO <sub>2</sub> )-C <sub>6</sub> H <sub>4</sub>  |    | 94        | 10         |
| 5     |   | 2-(OCH <sub>3</sub> )-4(OCH <sub>3</sub> )          |    | 90        | 14         |
| 6     |   | 3-(OCH <sub>3</sub> )-4(OH)                         |    | 86        | 12         |
| 7     |   | 4-(CH <sub>3</sub> )-C <sub>6</sub> H <sub>4</sub>  |   | 92        | 10         |
| 8     |   | 4-(OH)-C <sub>6</sub> H <sub>4</sub>                |  | 86        | 15         |
| 9     | S | C <sub>6</sub> H <sub>5</sub>                       |  | 90        | 10         |
| 10    |   | 4-(OCH <sub>3</sub> )-C <sub>6</sub> H <sub>4</sub> |  | 90        | 15         |
| 11    |   | 4-Cl-C <sub>6</sub> H <sub>4</sub>                  |  | 92        | 12         |

<sup>a</sup> Reaction conditions: 1mmol of aldehyde, 1mmol β-diketoester (ethylacetoacetate) and 1.5mmol urea or thiourea catalyzed by ‘ionic liquid-ethylene glycol’ protected copper nanoparticles at room temperature. Confirmed by FT-IR, TLC, <sup>1</sup>H NMR and <sup>13</sup>C NMR. Isolated pure.

**Figure 6. Biginelli reaction catalyzed by ‘ionic liquid-ethylene glycol’ protected copper nanoparticles at room temperature<sup>a</sup>.**  
doi:10.1371/journal.pone.0043078.g006

characterized by <sup>1</sup>H NMR studies as reported by us previously. Subsequently copper nanoparticles was prepared as described in the presence of ethylene glycol and ionic liquid [bmim]BF<sub>4</sub> (24). An aliquot amount of ‘ionic liquid-ethylene glycol’ protected copper

nanoparticles were taken out and particle size distribution measurements were done using particle size analyzer (QELS, Photocor-FC, model-1135 P). Transmission electron microscope (TEM, FEI Technai 300 kV fitted with EDAX) was used to image

**Table 1.** Effect of various catalysts employed in Biginelli reaction catalyzed by ‘ionic liquid- ethylene glycol’ protected copper nanoparticles at room temperature<sup>a</sup>.

| S.No | Reaction conditions                                                     | Time                                   | Yield       |
|------|-------------------------------------------------------------------------|----------------------------------------|-------------|
| 1    | Without catalyst                                                        | No reaction                            | No reaction |
| 2    | [bmim]BF <sub>4</sub>                                                   | No reaction                            | No reaction |
| 3    | Bare Cu nanoparticles                                                   | Oxidation of nanoparticle              | No reaction |
| 4    | Cu nanoparticles dispersed in ethylene glycol                           | Oxidation of nanoparticles after 5 min | No reaction |
| 5    | Cu nanoparticles stabilized with [bmim]BF <sub>4</sub> -ethylene glycol | 10 min                                 | 98%         |
| 6    | Hydrazine hydrate                                                       | Sticky mass; incomplete reaction.      |             |

<sup>a</sup>Reaction conditions: 1 mmole benzaldehyde, 1 mmole ethylacetoacetate and 1.5 mmole urea catalysed by ‘ionic liquid-ethylene glycol’ protected copper nanoparticles at room temperature.

doi:10.1371/journal.pone.0043078.t001

size and morphology of the powder. X-ray diffraction patterns of the powders were recorded using diffractometer (Philips Analytica PW 1830 X-ray equipped with a 2θ compensting slits).

### 3. General Procedure for Synthesis of 3,4-dihydropyrimidinones

A mixture of aldehyde (1 mmol), β-diketoester (ethylacetoacetate) (1 mmol) and urea (or thiourea) (1.5 mmol) was stirred for fifteen minutes in the presence of 100 μl of highly dispersed reaction mixture containing ‘ionic liquid-ethylene glycol’ protected copper nanoparticles from the previous experiment (Figure 1). The reaction was monitored by thin layer chromatography using ethyl acetate/hexane (2:3) as eluent. The mixture was then extracted thrice with 10 ml of ethyl acetate, drying the organic layer in vacuum afforded 3,4-dihydropyrimidinones. The ionic liquid residue was washed with hexane and dried in vacuum resulting in a recycled catalytic system which could be used over three turns.

## Results and Discussion

We discover that ionic liquid in conjunction with ethylene glycol play a vital role in the stabilization of copper nanoparticles, and both the ionic liquid and ethylene glycol play an important role in the process. The ionic liquid [bmim]BF<sub>4</sub>, serves as an excellent media for dispersing copper nanoparticles, controlling their size and preventing their aerial oxidation; however agglomeration could not be avoided in the absence of ethylene glycol. On the other hand, while the reaction takes place effectively in the

absence of hydrophilic ionic liquid [bmim]BF<sub>4</sub>, the stability of the formed particles could not be extended for longer periods of time.

After separating the copper nanoparticles from the suspension, their shape and size distribution was analyzed by DLS and TEM. The average sizes were calculated from the XRD peak data. The UV-Visible spectra of Copper nanoparticles formed in “[bmim]BF<sub>4</sub> - ethylene glycol” system is shown in Fig. 2. TEM images in Fig. 3 illustrates the formation of spherical, ‘ionic liquid-ethylene glycol’ protected copper nanoparticles with little agglomeration. Fig. 4 shows the size distribution from DLS data, revealing a mean size of 40±3 nm in diameter with polydispersity index of 0.203. XRD patterns of the copper nanoparticles prepared from this procedure was plotted in Fig. 5, and it has 2θ values from 20° to 90°. XRD pattern reflections correspond to that of pure copper, showing three peaks corresponding to indices: (111), (200) and (220); which is the characteristic of pure copper. Thus, these peaks accurately resemble oxide-free FCC copper phase with no impurity.

The Biginelli reaction involving benzaldehyde (and other variously substituted aryl-aldehydes) (1 mmol), ethylacetoacetate (1 mmol) and urea or thiourea (1.5 mmol) was successfully catalyzed by copper nanoparticles dispersed in ionic liquid [bmim]BF<sub>4</sub> at room temperature. The results of the reaction are represented in Figure 6. The yield of the product and the time taken for the reaction is reported alongside indicating the efficacy of the catalyst at room temperature. A control reaction was carried out to test the requirement of a catalyst by stirring the reagents in the absence of the catalyst. No desirable products could be detected in this case.

Furthermore, it was shown that ionic liquid alone was ineffective in catalyzing the model reaction (Figure 1) at room temperature in the absence of copper nanoparticles. Interestingly, the copper nanoparticles were also unable to catalyze the reaction by itself as they were inadvertently oxidized in the absence of the stabilizing ionic liquid. (Table 1). Moreover, the copper nanoparticles dispersed in ethylene-glycol (but in the absence of ionic liquid [bmim]BF<sub>4</sub>) could also not catalyze the reaction as the unprotected nanoparticles are oxidized within 5 minutes. This is consistent with our previous observation that both ethylene glycol and ionic liquid [bmim]BF<sub>4</sub> is required for synthesizing stable, monodispersed nanoparticles. This also demonstrated that stabilized copper nanoparticles are required for catalyzing the Biginelli reaction. The stable catalytic system could be reused successively for three turns (Table 2) with negligible loss of activity. ‘Ionic liquid-ethylene glycol’ protected copper nanoparticles retained 80% of their efficacy after being recycled three times as evidenced by the reactions of compounds 1 and 7 in Figure 6 (with C<sub>6</sub>H<sub>5</sub> and

**Table 2.** Reuse of catalytic system containing copper nanoparticles stabilised by [bmim]BF<sub>4</sub>-ethylene glycol for Biginelli reaction<sup>a</sup>.

| Run | Table 1, Entry 1 |                        | Table 1, Entry 7 |                        |
|-----|------------------|------------------------|------------------|------------------------|
|     | Time (min)       | Yield (%) <sup>b</sup> | Time (min)       | Yield (%) <sup>b</sup> |
| 1   | 10               | 98                     | 10               | 90                     |
| 2   | 10               | 86                     | 10               | 89                     |
| 3   | 10               | 80                     | 10               | 77                     |

<sup>a</sup>Reaction condition: 1 mmole aldehyde, 1 mmole ethylacetoacetate, 1.5 mmole urea catalyzed by ‘ionic liquid-ethylene glycol’ protected copper nanoparticles at room temperature.

<sup>b</sup>Confirmed by FT-IR, TLC, <sup>1</sup>H NMR and <sup>13</sup>C NMR. Isolated pure.

doi:10.1371/journal.pone.0043078.t002

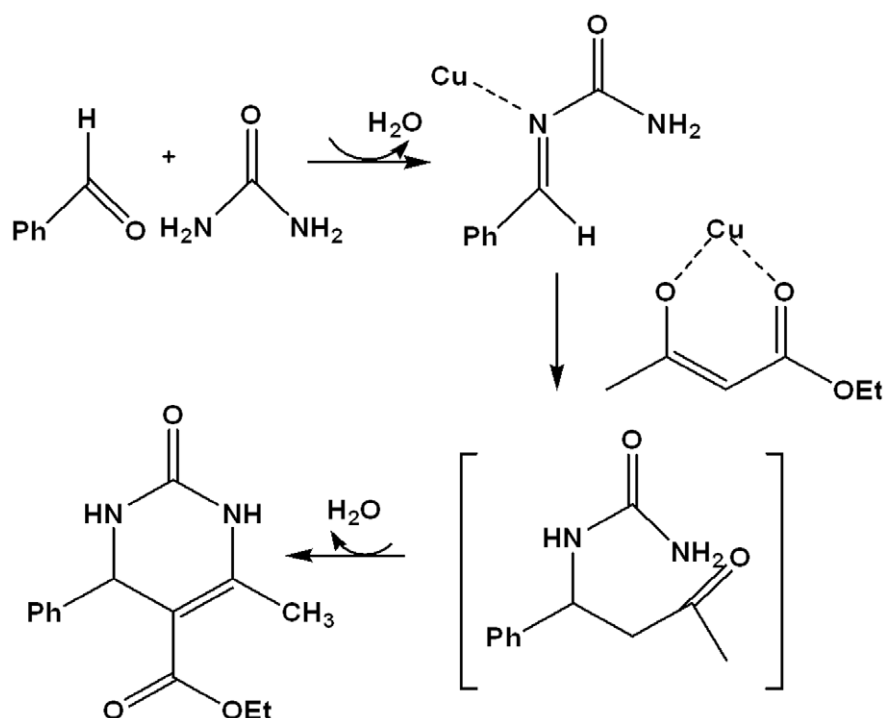

**Figure 7. Proposed mechanism for the synthesis of 3,4-dihydropyrimidin-2-ones using 'ionic liquid- ethylene glycol' protected copper nanoparticles.**

doi:10.1371/journal.pone.0043078.g007

4-(CH<sub>3</sub>)- C<sub>6</sub>H<sub>4</sub> substituents respectively) to yield the corresponding 3,4-dihydropyrimidinones (Table 2).

The proposed mechanism in Figure 7 illustrates the postulated interaction of the acylimine intermediate with copper nanoparticles. A cursory examination of the reaction mechanism suggests that electron withdrawing groups in the aryl aldehyde would accelerate the rate of the reaction. However, it is intriguing to note that the reaction proceeded rapidly to afford such high yields irrespective of whether electron-withdrawing or electron-donating side chains were attached to the reactant aryl aldehyde. This could be attributed to the surface-active particles reacting faster in the presence of ionic liquid as compared to conventional methods. Taken together, these results prove the efficacy of the catalytic system (copper nanoparticles stabilized by ionic liquid- ethylene glycol mixture) as a catalyst for the synthesis of biologically active 3,4-dihydropyrimidinones.

## Conclusion

The results laid down by these experiments proved the efficacy of the copper nanoparticles stabilized by ionic liquid- ethylene glycol mixture as catalysts for the synthesis of biologically active 3,4-dihydropyrimidinones. The products were obtained rapidly with high yields at room temperature.

## Supporting Information

**Supporting Information S1 Graphical Abstract.** (DOC)

## Author Contributions

Conceived and designed the experiments: AK SM. Performed the experiments: MD AK AS. Analyzed the data: AD. Contributed reagents/materials/analysis tools: AK. Wrote the paper: MD AD.

## References

1. Zhu J, Shen Y, Xie A, Qiu L, Zhang Q, et al. (2007) Photoinduced Synthesis of Anisotropic Gold Nanoparticles in Room-Temperature Ionic Liquid. *J Phys Chem C* 111: 7629–7633.
2. Swadzba-K M, Chancelier L, Ng S, Manyar HG, Hardacre C, et al. (2012) Facile in situ synthesis of nanofluids based on ionic liquids and copper oxide clusters and nanoparticles *Dalton Trans.*, 41: 219–227.
3. Wang GB, Wang X, Lou W, Hao J (2011) Gold-ionic liquid nanofluids with preferably tribological properties and thermal conductivity *Nanoscale Research Letters* 6: 259.
4. Zhu H, Zhang C, Yin Y (2005) Novel Synthesis of Copper Nanoparticles: Influence of the Synthesis Conditions on the Particle Size. *Nanotechnology* 16: 3079–3083.
5. Khanna PK, Gaikwad S, Adhyapak PV, Singh N, Marimuthu R (2007) Synthesis and characterization of copper nanoparticles. *Materials Letters* 61: 4711–4714.
6. Niasari MS, Davar F (2009) Synthesis of copper and copper(I) oxide nanoparticles by thermal decomposition of a new precursor. *Materials Letters* 63: 441–443.
7. Dhas NA, Raj CP, Gedanken A (1998) Synthesis, characterization and properties of metallic copper nanoparticles. *Chem. Mater* 10: 1446–1452.
8. Welton T (2004) Ionic liquids in catalysis Review Article *Coordination Chemistry Reviews*, 248: 2459–2477.
9. Hallett JP, Welton T (2011) Room-Temperature Ionic Liquids: Solvents for Synthesis and Catalysis: 3508–3576.
10. Welton T (1999) Room-Temperature Ionic Liquids. *Solvents for Synthesis and Catalysis*: 2071–2084.
11. He Y, Shen X (2008) Interaction between  $\beta$ -cyclodextrin and ionic liquids in aqueous solutions investigated by a competitive method using a substituted 3H-indole probe. *Journal of Photochemistry and Photobiology A: Chemistry* 197: 253–259.
12. Holomb R, Martinelli R, Albinsson I, Lassegues JC, Johansson P, et al. (2008) Ionic liquid structure: the conformational isomerism in 1-butyl-3-methylimidazolium tetrafluoroborate ([bmim][BF<sub>4</sub>]) *Journal of Raman Spectroscopy* 39: 793–805.
13. Trohalaki S, Pachter R (2005) Prediction of Melting Points for Ionic Liquids *QSAR Combinatorial Science*. 24: 485–490.

14. Kachoosangi RT, Musameh MM, Yousef IA, Yousef JM, Kanan SM, et al. (2009) Carbon Nanotube Ionic Liquid Composite Sensors and Biosensors Analytical Chemistry 81: 435–442.
15. Zhang J, Wang J, Zhou S, Duan K, Feng B, et al. (2010) Ionic liquid-controlled synthesis of ZnO microspheres J. Mater. Chem. 20: 9798–9804.
16. Redel E, Thomann R, Janiak C (2008) Use of ionic liquids (ILs) for the IL-anion size-dependent formation of Cr, Mo and W nanoparticles from metal carbonyl M(CO)<sub>6</sub> precursors. Chem Commun 15: 1789–1791.
17. Zhang M, Xu X, Zhang M (2008) Microwave-Assisted Synthesis and Characterization of CuO Nanocrystals. Journal of Dispersion Science and Technology 29: 508–513.
18. Germani R, Mancini MV, Savelli G, Spreti N (2007) Mercury extraction by ionic liquids: temperature and alkyl chain length effect. Tetrahedron Letters 48: 1767–1769.
19. Paczal A, Kotschy A (2007) Asymmetric synthesis in Ionic Liquids. Monatshchemie 138: 1115–1123.
20. Ha SH, Menchavez RN, Koo YM (2010) Reprocessing of spent nuclear waste using ionic liquids. Korean J Chem Eng 27: 1360–1365.
21. Kamavaram V, Reddy RG (2008) Thermal stabilities of di-alkylimidazolium chloride ionic liquids. International Journal of Thermal Sciences 47: 773–777.
22. Liu X, Zhou F, Liang Y, Liu W (2006) Benzotriazole As The Additive For Ionic Liquid Lubricant: One Pathway Towards Actual Application of Ionic Liquid. Tribology Letters 23: 191–196.
23. Ansari I A, Joyasawal S, Gupta MK, Yadav JS, Gree R (2005) Wacker oxidation of terminal olefins in a mixture of [bmim][BF<sub>4</sub>] and water. Tetrahedron Letters 46: 7507–7510.
24. Hanusek J, Machacek V, Lycka A (2007) Reaction of 2-naphthol with substituted benzenediazonium salts in [bmim][BF<sub>4</sub>]. Dyes and Pigments 73: 326–331.
25. Chu CD, Qi YH, Haw W (2007) A more efficient synthetic process of N - arylphthalimides in ionic liquid [bmim][BF<sub>4</sub>] Catalysis Communications 8: 1527–1530.
26. Zhou Y (2005) Recent advances in ionic liquids for synthesis of inorganic nanomaterials. Current Nanoscience 1: 35–42.
27. Antonietti M, Kuang D, Smarsly B, Zhou Y (2004) Ionic Liquids for the Convenient Synthesis of Functional Nanoparticles and Other Inorganic Nanostructures. Angew Chem Int Ed 43: 4988–4992.
28. Kim KS, Dembereinyamba ND, Yeon S, Choi S, Cha J (2005) One-Phase Preparation of Palladium Nanoparticles Using Thiol-Functionalized Ionic Liquid. Korean J Chem Eng 22: 717–720.
29. Li W, Bin Z, Yong YZ, Jun ZX, Duan WQ, et al. (2007) Synthesis of CuO nanostructures in ionic liquids. Sci China Ser B-Chem 50: 63–69.
30. Dewan M, Kumar A, Saxena A, De A, Mozumdar S (2012) Using Hydrophilic Ionic Liquid, [bmim]BF<sub>4</sub>– Ethylene Glycol System as a Novel Media for the Rapid Synthesis of Copper Nanoparticles PLoS ONE 7(1): e29131.
31. Kappe CO (2000) Biologically active dihydropyrimidinones of the Biginelli-type - a literature survey. Eur. J. Med. Chem. 35: 1043–1052.
32. Singh K, Arora D, Singh K, Singh S (2009) Genesis of Dihydropyrimidinone Calcium Channel Blockers: Recent Progress in Structure-Activity Relationships and Other Effects. Mini-Reviews in Medicinal Chemistry 9: 95–106.
33. Patil AD, Kumar NV, Kokke WC, Bean MF, Freyer AJ, et al. (1995) Novel Alkaloids from the Sponge Batzella sp.: Inhibitors of HIV gp120-Human CD4 Binding. J. Org. Chem. 60: 1182–1188.
34. Liu CJ, Wang JD (2009) Novel Alkaloids from the Sponge Batzella sp.: Inhibitors of HIV gp120-Human CD4 Binding Copper(II) Sulfamate: An Efficient Catalyst for the One-Pot Synthesis of 3,4-Dihydropyrimidine-2(1 H)-ones and thiones. Molecules 14: 763–770.
35. Choudhary VR, Tillu VH, Narkhede VS, Borate HB, Wakharkar RD (2003) Microwave assisted solvent-free synthesis of dihydropyrimidinones by Biginelli reaction over Si-MCM-41 supported FeCl<sub>3</sub> catalyst. Catalysis Communications 4: 449–453.
36. Jiang C, You QD (2007) An efficient and solvent-free one-pot synthesis of dihydropyrimidinones under microwave irradiation. Chinese Chemical Letters 18: 647–650.
37. Pasunooti KK, Chai H, Jensen CN, Gorityala BK, Wang S, et al. (2011) A microwave-assisted, copper-catalyzed three-component synthesis of dihydropyrimidinones under mild conditions. Tetrahedron Letters 52: 80–84.
38. Wipf P, Cunningham A (1995) Generation of dihydropyrimidine libraries. Tetrahedron Letters 36: 7819.
39. Jain SL, Joseph JK, Sain B (2007) Ionic liquid promoted an improved synthesis of 3,4-dihydropyrimidinones using [bmim]BF<sub>4</sub> immobilized Cu (II) acetylacetonate as recyclable catalytic system Catalysis Letters 115: 52–55.
40. Kamal A, Krishnaji T, Azhar MA (2007) Copper(II) tetrafluoroborate as a mild and efficient catalyst for the one-pot synthesis of 3,4-dihydropyrimidin-2(1 H)-ones under solvent-free conditions. Catalysis Communications 8: 1929–1933.
41. Dewan M, Kumar A, Saxena A, De A, Mozumdar S (2010) Molecular iodine in [bmim][BF<sub>4</sub>]: a highly efficient green catalytic system for one-pot synthesis of 1,3-oxathiolan-5-one. Tetrahedron Letters 51: 6108–6110.
42. Kumar A, Singh P, Saxena A, De A, Chandra R, et al. (2008) Cu-nanoparticles– an efficient catalyst for one pot three component synthesis of Thiazolidine-2,4-dione derivatives. Catalysis Communications 10: 17–22.
43. Kumar A, Dewan M, Saxena A, De A, Mozumdar S (2010) Knoevenagel condensation catalyzed by chemo-selective Ni-nanoparticles in neutral medium. Catalysis Communications 11: 679–683.
44. Kumar A, Kumar S, Saxena A, De A, Mozumdar S (2008) Ni-Nanoparticles: An Efficient Catalyst for the Synthesis of Quinoxalines. Catalysis Communications, 9: 778–784.
45. Kumar A, Kumar S, Saxena A, De A, Mozumdar S (2008) Selective Protection of Carbonyl Compounds over Nano-Sized Nickel Catalysts. Catalysis Letters 122: 98–105.
46. Kumar A, Saxena A, Dewan M, De A, Mozumdar S (2011) Recyclable nanoparticulate copper mediated synthesis of naphthoxazinones in PEG-400: a green approach. Tetrahedron Letters 38: 4835–4839.
47. Kumar A, Aerry S, Saxena A, De A, Mozumdar S (2012) “Copper nanoparticles in Guar-gum: an alternative recyclable catalytic system for the Huisgen[3+2]-cycloaddition of azides and alkynes without additives under Ambient Conditions” Green Chemistry, 14, 1298–1301.
